# Supplementary material
Source: publisher site journal article supplement (https://www.dovepress.com/article/293480)
Supplement: Supplementary file 1 [file get_supplementary_file.php]

## **SUPPLEMENTARY INFORMATION**

### **FULL TITLE**

Regression of melanoma after intravenous administration of plumbagin entrapped in transferrin-conjugated, lipid–polymer hybrid nanoparticles

### **AUTHORS NAMES AND AFFILIATION**

Intouch Sakpakdeejaroen <sup>a</sup>, Sukrut Somani <sup>a</sup>, Partha Laskar <sup>a</sup>, Margaret Mullin <sup>b</sup>,  
Christine Dufès <sup>a, \*</sup>

<sup>a</sup> Strathclyde Institute of Pharmacy and Biomedical Sciences, University of Strathclyde, 161 Cathedral Street, Glasgow G4 0RE, United Kingdom

<sup>b</sup> College of Medical, Veterinary and Life Sciences, University of Glasgow, Glasgow G12 8QQ, United Kingdom

### **\* CORRESPONDING AUTHOR**

Christine Dufès

Strathclyde Institute of Pharmacy and Biomedical Sciences, University of Strathclyde,  
161 Cathedral Street, Glasgow G4 0RE, United Kingdom

Phone: 44 -141 548 3796

Fax: 44 -141 552 2562

E-mail: [C.Dufes@strath.ac.uk](mailto:C.Dufes@strath.ac.uk)

### *Cellular uptake*

For the purpose of qualitative and quantitative cellular uptake studies of lipid-polymer hybrid nanoparticles using flow cytometry and confocal microscopy, coumarin-6 was used as a fluorescent lipophilic drug model, as plumbagin does not contain a fluorophore that can emit light upon excitation. Coumarin-6 loaded lipid-polymer hybrid nanoparticles were prepared and characterised for entrapment efficiency, size and zeta potential measurements.

As shown in Table S1, Tf-bearing LPN and control LPN displayed relatively high entrapment efficiency of coumarin-6 ( $40.9 \pm 0.6$  % for Tf-bearing LPN and  $47.6 \pm 0.7$  % for control LPN), with a similar size and zeta potential trend as for the nanoparticles entrapping plumbagin.

The conjugation of Tf to the surface of lipid-polymer hybrid nanoparticles entrapping coumarin-6 led to an increase in the mean diameter size of Tf-bearing LPN ( $222.4 \pm 3.1$  nm) compared to control LPN ( $139.1 \pm 0.5$  nm). Furthermore, the polydispersity index of all formulations was low (0.18 – 0.22), indicating a uniformly dispersed nanomedicine formulation with a narrow size distribution. In addition, both Tf-bearing LPN and control LPN were bearing a negative surface charge ( $-37.6 \pm 0.2$  mV for Tf-bearing LPN and  $-49.9 \pm 0.3$  mV for control LPN).

These results therefore demonstrated that the entrapment of coumarin-6 in the lipid-polymer hybrid nanoparticles did not change their physico-chemical properties, such as the particle size and surface charge, compared with the original formulations entrapping plumbagin.

**Table S1.** Entrapment efficiency, size and zeta potential of lipid-polymer hybrid nanoparticles entrapping coumarin-6 (n=3)

| Nanoparticle formulations | Entrapment efficiency (%) | Particle Size (nm) | Polydispersity Index | Zeta Potential (mV) |
|---------------------------|---------------------------|--------------------|----------------------|---------------------|
| Tf-bearing LPN            | 40.9 ± 0.6                | 222.4 ± 3.1        | 0.22 ± 0.01          | -37.6 ± 0.2         |
| Control LPN               | 47.6 ± 0.7                | 139.1 ± 0.5        | 0.18 ± 0.01          | -49.9 ± 0.3         |

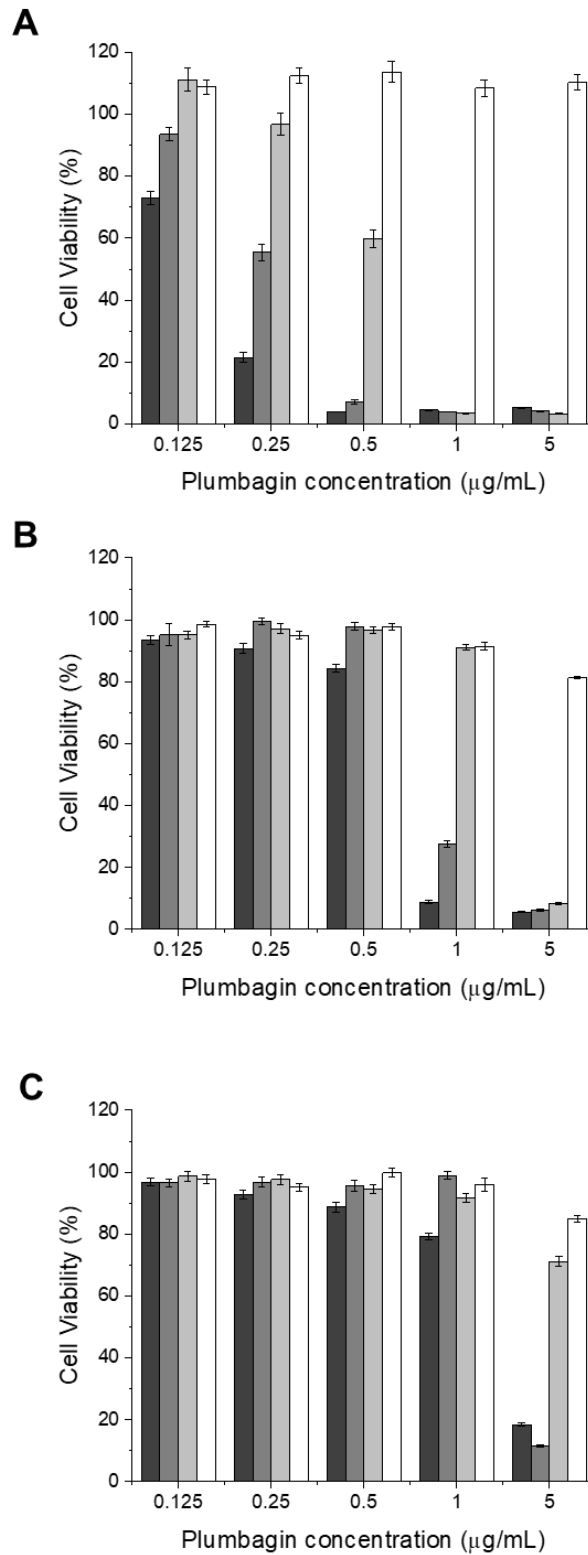

**Figure S1.** Anti-proliferative effect of plumbagin either entrapped in Tf-bearing LPN (dark grey), control LPN (grey) or in solution (light grey) on B16-F10 (A), A431 (B) and T98G cells (C) after 24h treatment (control: blank vesicles (white)) (n=15).
